# Supplementary material
Source: HighWire-hosted journal article supplement (https://gh.bmj.com/content/8/3/e011071)
Supplement: inline-supplementary-material-2 [file inline-supplementary-material-2.pdf]

### **Supplementary information**

#### ***Sample size***

Post-hoc power calculation for the secondary outcomes of the trial is presented in supplementary table 1. To estimate power, we used the actual sample size specific to the intervention-outcome pair that was included in the analysis along with the intracluster correlation of that outcome in that sample, as shown in the supplementary table 1. The trial included a total of 137 clusters and assuming approximately equal cluster size, we estimated the design effect as shown in Equation 1, where  $m$  refers to the average cluster size and  $\rho$  is the intracluster correlation. The effective sample size was obtained by dividing the actual sample size with the design effect.

$$\text{Design effect} = 1 + (m - 1)\rho \dots \dots \dots \text{Eq 1.}$$

We estimated the power using the effective sample sizes, observed proportions of the outcomes and the risks for each intervention-outcome pair using the software PASS 2020 [1]. We used 1:1 ratio of participants in the two arms and accounted for two-level data structure with randomization at the cluster (highest) level. A priori power calculation, for a given sample size, gives the probability of detecting a pre-specified effect size at the 95% confidence level. However, this was a post-hoc power calculation after obtaining the results. In some instances, this study did not meet the minimum acceptable level of 80% power to detect the observed effect significantly.

#### ***Reference***

1. NCSS LLC., *Power Analysis and Sample Size Software*. 2020: Kaysville, Utah, USA.

**Supplementary Table 1. Post-hoc power estimation for the outcomes.**

|                                                           | Actual sample size | Intraclass correlation | Design effect | Effective sample size | Relative risk | Power (%) |
|-----------------------------------------------------------|--------------------|------------------------|---------------|-----------------------|---------------|-----------|
| <i>Intervention vs. control*</i>                          |                    |                        |               |                       |               |           |
| Received any antenatal care                               | 5112               | 0.1376                 | 6.00          | 852                   | 1.05          | 45.4      |
| Four or more total antenatal visits                       | 4,593              | 0.0867                 | 3.82          | 1203                  | 1.25          | 75.4      |
| Antenatal care initiated in the 1 <sup>st</sup> trimester | 4,487              | 0.0276                 | 1.88          | 2391                  | 1.11          | 63.6      |
| Intermittent preventive treatment of pregnancy            | 4857               | 0.0532                 | 2.83          | 1715                  | 1.06          | 21.9      |
| Institutional delivery                                    | 5036               | 0.2597                 | 10.29         | 490                   | 1.06          | 11.6      |
| <i>Study years 2 and 3 vs. baseline</i>                   |                    |                        |               |                       |               |           |
| Received any antenatal care                               | 13999              | 0.2083                 | 22.08         | 634                   | 1.83          | 99.9      |
| Four or more total antenatal visits                       | 8013               | 0.0553                 | 4.18          | 1917                  | 2.59          | 99.9      |
| Antenatal care initiated in the 1 <sup>st</sup> trimester | 7870               | 0.0168                 | 1.95          | 4040                  | 1.15          | 99.5      |
| Intermittent preventive treatment of pregnancy            | 12294              | 0.0639                 | 6.67          | 1842                  | 3.42          | 99.9      |
| Institutional delivery                                    | 11704              | 0.2185                 | 19.45         | 602                   | 1.54          | 99.9      |

\* Assumption – 137 clusters with approximately equal size.

**Supplementary Table 2. Distribution of the maternal health indicators and their 95% confidence intervals presented by trial arms as reported in the Figure 2 of the main document.**

|                                                           | Intervention        | Control             |
|-----------------------------------------------------------|---------------------|---------------------|
| Outcomes                                                  | Proportion (95% CI) | Proportion (95% CI) |
| Received any antenatal care                               |                     |                     |
| Baseline                                                  | 57.1 (55.7, 58.5)   | 47.3 (45.8, 48.8)   |
| Year 2                                                    | 91.7 (90.3, 93.2)   | 87.8 (86.0, 89.5)   |
| Year 3                                                    | 91.6 (90.0, 93.1)   | 88.5 (86.7, 90.4)   |
| Four or more total antenatal visits                       |                     |                     |
| Baseline                                                  | 16.4 (14.7, 18.0)   | 14.6 (12.8, 16.4)   |
| Year 2                                                    | 36.4 (33.8, 39.0)   | 31.2 (28.9, 33.8)   |
| Year 3                                                    | 43.8 (40.8, 46.7)   | 32.6 (29.7, 35.5)   |
| Antenatal care initiated in the 1 <sup>st</sup> trimester |                     |                     |
| Baseline                                                  | 44.2 (41.9, 46.4)   | 42.4 (40.0, 44.9)   |
| Year 2                                                    | 54.0 (51.3, 56.8)   | 50.0 (47.0, 52.7)   |
| Year 3                                                    | 51.7 (48.6, 54.7)   | 46.0 (42.9, 49.0)   |
| Intermittent preventive treatment of pregnancy            |                     |                     |
| Baseline                                                  | 19.7 (18.4, 20.9)   | 19.1 (17.8, 20.4)   |
| Year 2                                                    | 56.4 (53.7, 59.0)   | 54.1 (51.4, 56.8)   |
| Year 3                                                    | 58.4 (55.5, 61.4)   | 53.8 (50.8, 56.7)   |
| Institutional delivery                                    |                     |                     |
| Baseline                                                  | 44.2 (42.6, 45.8)   | 42.6 (40.8, 44.4)   |

|        |                   |                   |
|--------|-------------------|-------------------|
| Year 2 | 58.4 (55.8, 61.0) | 56.5 (53.9, 59.2) |
| Year 3 | 60.2 (57.4, 63.0) | 57.5 (54.6, 60.3) |

**Supplementary Table 3. Proportion of pregnancies who received of four or more and eight or more antenatal contacts obtained from the Community Health Workers mobile application data, presented by trial arms.**

| Data source     | Description                           | Indicator                                   | Trial years 2 and 3* |      |         |     |       |      |
|-----------------|---------------------------------------|---------------------------------------------|----------------------|------|---------|-----|-------|------|
|                 |                                       |                                             | Intervention         |      | Control |     | Total |      |
|                 |                                       |                                             | n                    | %    | n       | %   | n     | %    |
| CHW application | Total (facility + community) contacts | Pregnancies that received antenatal contact | 1725                 |      | 1053    |     | 2778  |      |
|                 |                                       | 4 or more contacts                          | 778                  | 45.1 | 78      | 7.4 | 856   | 30.8 |
|                 |                                       | 8 or more contacts                          | 329                  | 19.1 | 24      | 2.3 | 353   | 12.7 |
|                 | Only community-based contacts         | Pregnancies that received antenatal contact | 1720                 |      | 1045    |     | 2765  |      |
|                 |                                       | 4 or more contacts                          | 762                  | 44.3 | 77      | 7.4 | 839   | 30.3 |
|                 |                                       | 8 or more contacts                          | 319                  | 18.6 | 24      | 2.3 | 343   | 12.4 |

\* ANC contacts between February 2018 and February 2020 i.e., trial years 2 and three.

**Supplementary Table 4. Heterogeneity of the effect of intervention on indicators of antenatal care and institutional delivery by distance to the nearest primary health care facility, cluster population at baseline, or household wealth.**

|                                                                         | Received any antenatal care* | Four or more total antenatal visits* | Antenatal care initiated in the 1 <sup>st</sup> trimester* | Intermittent preventive treatment of pregnancy* | Institutional delivery* |
|-------------------------------------------------------------------------|------------------------------|--------------------------------------|------------------------------------------------------------|-------------------------------------------------|-------------------------|
| <i>Residential distance to the nearest primary health care facility</i> |                              |                                      |                                                            |                                                 |                         |
| Interaction coefficient (95% CI) <sup>†</sup>                           | 0.23 (-0.42, 0.87)           | -0.04 (-0.50, 0.43)                  | 0.23 (-0.12, 0.58)                                         | 0.06 (-0.34, 0.46)                              | 0.28 (-0.46, 1.01)      |
| p-value                                                                 | 0.49                         | 0.87                                 | 0.19                                                       | 0.77                                            | 0.46                    |
| <i>Cluster population at baseline</i>                                   |                              |                                      |                                                            |                                                 |                         |
| Interaction coefficient (95% CI)                                        | -0.05 (-0.72, 0.61)          | 0.22 (-0.24, 0.68)                   | -0.11 (-0.43, 0.21)                                        | -0.03 (-0.42, 0.37)                             | -0.22 (-0.91, 0.47)     |
| p-value                                                                 | 0.87                         | 0.35                                 | 0.50                                                       | 0.90                                            | 0.53                    |
| <i>Household wealth quintiles</i>                                       |                              |                                      |                                                            |                                                 |                         |
| Poor: Interaction coefficient (95% CI)                                  | -0.14 (-0.71, 0.43)          | 0.02 (-0.38, 0.43)                   | 0.29 (-0.06, 0.64)                                         | -0.17 (-0.59, 0.25)                             | 0.11 (-0.32, 0.55)      |
| p-value                                                                 | 0.64                         | 0.90                                 | 0.11                                                       | 0.42                                            | 0.60                    |
| Middle: Interaction coefficient (95% CI)                                | -0.29 (-0.93, 0.34)          | 0.15 (-0.24, 0.54)                   | 0.41 (-0.03, 0.85)                                         | -0.26 (-0.64, 0.13)                             | -0.17 (-0.66, 0.32)     |
| p-value                                                                 | 0.37                         | 0.44                                 | 0.07                                                       | 0.19                                            | 0.50                    |
| Rich: Interaction coefficient (95% CI)                                  | -0.73 (-1.37, -0.09)         | 0.06 (-0.31, 0.44)                   | 0.29 (-0.05, 0.63)                                         | -0.17 (-0.54, 0.20)                             | 0.16 (-0.30, 0.61)      |
| p-value                                                                 | 0.03                         | 0.74                                 | 0.10                                                       | 0.36                                            | 0.50                    |
| Richest: Interaction coefficient (95% CI)                               | 0.08 (-0.47, 0.64)           | -0.11 (-0.49, 0.26)                  | 0.52 (0.12, 0.93)                                          | -0.38 (-0.74, -0.02)                            | 0.14 (-0.31, 0.59)      |
| p-value                                                                 | 0.77                         | 0.55                                 | 0.01                                                       | 0.04                                            | 0.54                    |

\* Each outcome was analyzed separately and each model included a fixed effects for intervention/control, year of intervention, a fixed effect for the interaction variable, a product term between intervention/control and the interaction variable, and a random intercept for cluster. The confidence intervals accounted for clustering of observations.

<sup>†</sup>The coefficient and the p-value presented in the table are for the product term only.

**Supplementary Table 5. Sensitivity analysis by additional adjustment of the main results in tables 2 and 3 with variables that showed some evidence of imbalance by study arms.**

| Outcomes                                                  | RR (95% CI) *        |                      |
|-----------------------------------------------------------|----------------------|----------------------|
|                                                           | Intervention/Control | Study years/Baseline |
| Received any antenatal care                               | 1.04 (1.01, 1.07)    | 1.75 (1.67, 1.80)    |
| Four or more total antenatal visits                       | 1.25 (1.08, 1.43)    | 2.44 (2.10, 2.80)    |
| Antenatal care initiated in the 1 <sup>st</sup> trimester | 1.11 (1.03, 1.20)    | 1.15 (1.03, 1.28)    |
| Intermittent preventive treatment of pregnancy            | 1.05 (0.96, 1.14)    | 2.99 (2.59, 3.40)    |
| Institutional delivery                                    | 1.07 (0.92, 1.21)    | 1.49 (1.34, 1.62)    |

\* The models included a fixed effect for year of intervention, residential distance to the nearest primary health center and baseline population of the cluster, maternal age, marital status and household wealth quintiles and random intercepts for clusters.

**Supplementary Table 6. Sensitivity analysis by including year 1 participants to the analytical cohort.**

| Outcomes                                                  | RR (95% CI) *        |                      |
|-----------------------------------------------------------|----------------------|----------------------|
|                                                           | Intervention/Control | Study years/Baseline |
| Received any antenatal care                               | 1.04 (1.01, 1.07)    | 1.43 (1.40, 1.44)    |
| Four or more total antenatal visits                       | 1.22 (1.06, 1.38)    | 2.21 (2.01, 2.41)    |
| Antenatal care initiated in the 1 <sup>st</sup> trimester | 1.12 (1.04, 1.19)    | 1.15 (1.05, 1.25)    |
| Intermittent preventive treatment of pregnancy            | 1.08 (0.99, 1.11)    | 2.15 (2.01, 2.27)    |
| Institutional delivery                                    | 1.06 (0.93, 1.18)    | 1.42 (1.32, 1.51)    |

\* The models included a fixed effect for year of intervention, residential distance to the nearest primary health center and baseline population of the cluster.



**Supplementary Table 7. Individual, household and cluster level characteristics, by trial arms and overall.**

| Characteristics                          | Years 2 and 3 |       |         |      | Year 1       |      |         |      |
|------------------------------------------|---------------|-------|---------|------|--------------|------|---------|------|
|                                          | Intervention  |       | Control |      | Intervention |      | Control |      |
|                                          | n             | %*    | n       | %*   | n            | %*   | n       | %*   |
| <i>Total participants<sup>#</sup></i>    | 2491          | 50.5  | 2441    | 49.5 | 2373         | 50.6 | 2314    | 49.4 |
| <i>Age at entry (years)</i>              |               |       |         |      |              |      |         |      |
| 15 - 19                                  | 297           | 11.9  | 325     | 13.3 | 181          | 7.6  | 209     | 9.0  |
| 20 - 34                                  | 1772          | 71.11 | 1753    | 71.8 | 1556         | 65.5 | 1560    | 67.4 |
| 35 - 49                                  | 365           | 14.7  | 320     | 13.1 | 588          | 24.8 | 509     | 22.0 |
| Missing                                  | 57            | 2.3   | 43      | 1.8  | 48           | 2.0  | 36      | 1.6  |
| <i>Marital status</i>                    |               |       |         |      |              |      |         |      |
| Married: monogamous                      | 1355          | 54.4  | 1276    | 52.3 | 1246         | 52.5 | 1264    | 54.6 |
| Married: polygamous                      | 1079          | 43.3  | 1105    | 45.4 | 1058         | 44.6 | 1004    | 43.4 |
| Never married/Widowed/Divorced/Separated | 57            | 2.3   | 60      | 2.5  | 69           | 2.9  | 46      | 2.0  |
| <i>Ethnicity</i>                         |               |       |         |      |              |      |         |      |
| Dogon                                    | 2169          | 87.1  | 2088    | 85.5 | 5866         | 24.7 | 528     | 22.8 |
| Peulh                                    | 18            | 0.7   | 23      | 0.9  | 4            | 0.2  | 7       | 0.3  |
| Others                                   | 19            | 0.8   | 49      | 2.0  | 4            | 0.2  | 7       | 0.3  |
| Missing                                  | 285           | 11.4  | 281     | 11.5 | xx           | xx   | xx      | 76.6 |
| <i>Education</i>                         |               |       |         |      |              |      |         |      |
| Any school (Madrasah or French)          | 261           | 10.5  | 291     | 10.0 | 77           | 3.2  | 101     | 4.4  |
| No formal education                      | 2072          | 83.2  | 2010    | 82.3 | 709          | 30.0 | 678     | 29.3 |
| Missing                                  | 158           | 6.4   | 140     | 5.7  | xx           | xx   | xx      | 66.3 |
| <i>Respondent's occupation</i>           |               |       |         |      |              |      |         |      |
| Housewife                                | 2041          | 81.9  | 1987    | 81.4 | 1882         | 79.3 | 1875    | 81.0 |
| Small business or trader                 | 441           | 17.7  | 441     | 18.1 | 447          | 18.8 | 400     | 17.3 |
| Other                                    | 0             | 0     | 4       | 0.2  | 26           | 1.1  | 33      | 1.4  |

|                                                                           |      |      |      |      |      |      |      |      |
|---------------------------------------------------------------------------|------|------|------|------|------|------|------|------|
| Missing                                                                   | 9    | 0.4  | 9    | 0.4  | 18   | 0.8  | 6    | 0.3  |
| <i>Household wealth quintile</i>                                          |      |      |      |      |      |      |      |      |
| Poorest                                                                   | 555  | 22.3 | 483  | 19.8 | 406  | 17.1 | 395  | 17.1 |
| Poor                                                                      | 473  | 19.0 | 476  | 19.5 | 415  | 17.5 | 473  | 20.4 |
| Middle                                                                    | 473  | 19.0 | 477  | 19.5 | 491  | 20.7 | 469  | 20.3 |
| Rich                                                                      | 484  | 19.4 | 492  | 20.2 | 499  | 21.0 | 500  | 21.6 |
| Richest                                                                   | 499  | 20.0 | 504  | 20.7 | 544  | 22.9 | 465  | 20.1 |
| Missing                                                                   | 7    | 0.3  | 9    | 0.4  | 18   | 0.8  | 12   | 0.5  |
| <i>Residential distance to nearest primary health center (kilometers)</i> |      |      |      |      |      |      |      |      |
| ≤ 5                                                                       | 1026 | 41.2 | 1195 | 49.0 | 1012 | 42.7 | 1138 | 49.2 |
| > 5                                                                       | 1465 | 58.8 | 1246 | 51.0 | 1361 | 57.4 | 1176 | 50.8 |
| <i>Cluster population at baseline</i>                                     |      |      |      |      |      |      |      |      |
| < 700                                                                     | 756  | 30.4 | 927  | 38.0 | 680  | 28.7 | 890  | 38.5 |
| ≥ 700                                                                     | 1735 | 69.7 | 1514 | 62.0 | 1693 | 71.3 | 1424 | 61.5 |

‡ Percentage for each characteristic is out of the total in that arm, except for the very first row.

**Supplementary Table 8. Sensitivity analysis by excluding control participants who received home visits from the analytical cohort.**

| Outcomes                                                  | RR (95% CI) *        |                      |
|-----------------------------------------------------------|----------------------|----------------------|
|                                                           | Intervention/Control | Study years/Baseline |
| Received any antenatal care                               | 1.05 (1.01, 1.07)    | 1.83 (1.78, 1.86)    |
| Four or more total antenatal visits                       | 1.25 (1.08, 1.43)    | 2.63 (2.32, 2.96)    |
| Antenatal care initiated in the 1 <sup>st</sup> trimester | 1.10 (1.01, 1.19)    | 1.15 (1.05, 1.25)    |
| Intermittent preventive treatment of pregnancy            | 1.07 (0.98, 1.16)    | 3.39 (2.94, 3.82)    |
| Institutional delivery                                    | 1.06 (0.91, 1.21)    | 1.54 (1.40, 1.66)    |

\* The models included a fixed effect for year of intervention, residential distance to the nearest primary health center and baseline population of the cluster.

**Supplementary Table 9. The participant-average treatment effect of the intervention (compared to control) and the effect of the intervention period (compared to baseline).**

| Outcomes                                                  | RR (95% CI) *                     |                      |
|-----------------------------------------------------------|-----------------------------------|----------------------|
|                                                           | Intervention/Control <sup>†</sup> | Study years/Baseline |
| Received any antenatal care                               | 1.05 (1.01, 1.08)                 | 1.72 (1.53, 1.95)    |
| Four or more total antenatal visits                       | 1.27 (1.10, 1.46)                 | 2.49 (2.18, 2.83)    |
| Antenatal care initiated in the 1 <sup>st</sup> trimester | 1.11 (1.03, 1.20)                 | 1.14 (1.04, 1.24)    |
| Intermittent preventive treatment of pregnancy            | 1.07 (0.98, 1.16)                 | 2.92 (2.46, 3.47)    |
| Institutional delivery                                    | 1.07 (0.93, 1.23)                 | 1.39 (1.25, 1.55)    |

\* The models included a fixed effect for year of intervention, residential distance to the nearest primary health center and baseline population of the cluster.

<sup>†</sup> Includes year 2 and year 3
